# Supplementary material for: Reinforcement and Stimulant Medication Ameliorate Deficient Response Inhibition in Children with Attention-Deficit/Hyperactivity Disorder
Source: Springer Nature journal article supplement (doi:10.1007/s10802-015-0031-x), 2015-05-19
Supplement: MOESM1 [file 542928]

| Study | Study 1 | | | | Study 2 | | | | | | Study 3 | | | | | |
| --- | --- | --- | --- | --- | --- | --- | --- | --- | --- | --- | --- | --- | --- | --- | --- | --- |
| Diagnostic Group | ADHD | | | | ADHD | | | TD | | | ADHD | | | | | |
| SST Version | Standard (ST) | | | | ST | RF Manip | | ST | RF Manip | | RF Manipulation | | | | | |
| Experiment  Condition | Base | Medication Manip | | | Base | RF Manip | | Base | RF Manip | | Placebo | | | .3MPH | | |
| Base | Placebo | .3MPH | .6MPH | Base | No RF | RF | Base | No RF | RF | No RF | RF | | No RF | RF | |
| Sample Size | 78 | 82 | | | 29 | 26 | | 33 | | | 20 | | | | | |
| Percent Inhibition | 45  (11) | 43  (14) | 48  (10) | 49  (10) | 42  (12) | 47  (14) | 46  (09) | 49  (06) | 50  (08) | 46  (05) | 48  (13) | | 49  (08) | 51  (09) | | 48  (06) |
| Percent Accuracy | 94  (08) | 91  (10) | 95  (10) | 97  (04) | 94  (08) | 85  (17) | 93  (07) | 98  (02) | 95  (03) | 95  (06) | 90  (09) | | 93  (08) | 89  (13) | | 93  (08) |
| MRT | 603  (96) | 588  (144) | 566  (133) | 558  (150) | 592  (106) | 619  (162) | 515  (121) | 548  (122) | 493  (102) | 419  (80) | 533  (155) | | 458  (120) | 490  (127) | | 425  (89) |
| SDRT | 186  (55) | 196  (72) | 161  (66) | 147  (47) | 195  (57) | 220  (76) | 162  (57) | 140  (44) | 149  (52) | 116  (43) | 190  (91) | | 144  (71) | 157  (74) | | 115  (59) |
| MSD | 307  (134) | 301  (169) | 383  (167) | 395  (182) | 272  (157) | 281  (171) | 288  (153) | 349  (156) | 284  (121) | 278  (109) | 236  (105) | | 242  (85) | 252  (94) | | 239  (65) |

Table S1. Additional measures of performance on the stop signal task for children with Attention-Deficit/Hyperactivity Disorder (ADHD) and typically developing controls (TD). Means (SD) are presented for each diagnostic group within study condition

S2. Results for percent inhibition and mean reaction time (MRT)

**Hypothesis 1: Diagnostic group differences**. We compared percent inhibition, MRT, and tau during the standard SST for the ADHD samples from the baseline day of Studies 1 and 2 to that of the TD sample from the baseline day of Study 2 using one-way ANOVA. Compared to control participants, children with ADHD exhibited lower percent inhibition, *F*(1,138)=4.2, *p*=.04 and higher MRT, *F*(1,138)=6.4, *p=*.01.

**Hypothesis 2: Methylphenidate effects.** To examine the effects of MPH on response inhibition, we analyzed performance data from the standard SST administered during the 3-day medication trial conducted in Study 1, which involved only children with ADHD. MPH effects were evaluated with a pair of orthogonal contrasts: a) active MPH (the average of the 0.3 and 0.6 mg/kg doses) versus placebo, and b) MPH dose (0.3 versus 0.6 mg/kg) ([Ashare et al., 2010](#_ENREF_3); [Shiels et al., 2009](#_ENREF_5); [Spencer et al., 2009](#_ENREF_6)).Among children with ADHD, active methylphenidate improved percent inhibition, *F*(1,81)=16.8, *p*<.001 and reduced MRT, *F*(1,81)=5.8, *p*=.02. There was no evidence of dose effect for percent inhibition, *F*(1,81)=0.5, *p*=.49, or MRT, *F*(1,81)=0.5, *p*=.49.

**Hypothesis 2a: Normalization of ADHD response inhibition with methylphenidate***.* To examine whether MPH normalized SST performance among children with ADHD, performance of children with ADHD in Study 1 on each dose of MPH (0.3 and 0.6 mg/kg; n=82) was compared with that of the TD control group during the same task (standard SST) on the baseline day for Study 2. The diagnostic group difference in percent inhibition and MRT reported above (hypothesis 1) was eliminated with 0.3 and 0.6 mg/kg MPH. Specifically, children with ADHD taking 0.3 mg/kg MPH did not differ from the TD controls in percent inhibition, *F*(1,113)=0.003, *p*=.96 or MRT, *F*(1,113)=0.5, *p*=.49. Similarly, children with ADHD taking 0.6 mg/kg MPH did not differ from the TD controls in percent inhibition, *F*(1,113)=0.1, *p*=.73, or MRT, *F*(1,113)=0.1, *p*=.74.

**Hypothesis 3: Reinforcement effects.** The impact of reinforcement on SST performance was examined on day two of Study 2, in which ADHD and TD participants completed the reinforcement-manipulation SST. A 2 x 2 ANOVA included the between-subjects factor diagnostic group (ADHD versus TD) and the within-subjects factor reinforcement condition (no-reinforcement versus reinforcement). Reinforcement Order (reinforcement first versus second) was also included, but this counterbalancing factor did not interact with diagnostic group. For percent inhibition, there were no significant effects [diagnostic group: *F*(1,55)=0.3, *p*=.61; reinforcement condition, *F*(1,55)=2.3, *p*=.13; and Diagnostic Group × Reinforcement Condition: *F*(1,55)=0.6, *p*=.44]. For MRT, there were significant effects of diagnostic group, *F*(1,55)=18.6, *p<.*001, and reinforcement condition, *F*(1,55)=108.2, *p*<.001, as well as a marginal Diagnostic Group × Reinforcement Condition interaction, *F*(1,55)=3.8, *p*=.06. Specifically, children with ADHD displayed higher MRT overall and reinforcement reduced MRT for ADHD and TD groups, but this reduction in MRT with reinforcement was greater for ADHD than for TD children.

**Hypothesis 3a: Normalization of ADHD response inhibition with reinforcement.** To evaluate the extent to which reinforcement normalized SST performance in children with ADHD, we compared percent inhibition and MRT for the ADHD group during the reinforcement condition of the reinforcement-manipulation SST to the controls during the no-reinforcement condition of the reinforcement-manipulation SST completed on day two of Study 2. The performance of children with ADHD during the reinforcement condition did not differ from that of controls when reinforcement was not provided for either percent inhibition, *F*(1,57)=2.7, *p*=.11, or MRT, *F*(1,57)=0.5, *p*=.47.

**Hypothesis 4: Comparison of the separate and combined effects of 0.3 mg/kg MPH and reinforcement in children with ADHD.** Whether the combination of MPH and reinforcement is more effective than either MPH or reinforcement alone was examined in Study 3, during which children with ADHD Combined type completed the reinforcement-manipulation SST on two consecutive days under placebo and 0.3 mg/kg MPH conditions, counterbalanced across participants. Orthogonal contrasts were employed to directly test of the effects of interest: (1) no treatment (no-reinforcement + placebo) versus single treatment (average of reinforcement alone and 0.3 mg/kg MPH alone), (2) reinforcement alone versus 0.3 mg/kg MPH alone, and (3) single treatment (average of reinforcement alone and 0.3 mg/kg MPH alone) versus combined treatment (reinforcement + 0.3 mg/kg MPH). There were no significant changes in percent inhibition across the treatment conditions. Specifically, percent inhibition did not significantly differ during (1) the single treatments (the average of MPH alone and reinforcement alone) compared to no-reinforcement + placebo, *F*(1,19)=0.7, *p*=.40, (2) the reinforcement alone and MPH alone conditions, *F*(1,19)=1.1, *p*=.31, or (3) the combination of reinforcement + MPH compared to the single treatments, *F*(1,19)=1.9, *p*=.19. For MRT, the single treatments (the average of MPH alone and reinforcement alone) decreased MRT compared to no-reinforcement + placebo, *F*(1,19)=11.5, *p*=.003. MRT was similar for reinforcement alone and MPH alone, *F*(1,19)=1.6, *p*=.22. Finally, the combination of reinforcement + MPH resulted in a further reduction in MRT compared to the single treatments, *F*(1,19)=25.1, *p*<.001.

**Hypothesis 4a: Normalization of ADHD response inhibition** **with the 0.3 mg/kg MPH and reinforcement.** We also examined whether the combination of reinforcement and 0.3 mg/kg MPH normalized percent inhibition and MRT by comparing the performance of children with ADHD in Study 3 during the reinforcement alone, 0.3 mg/kg MPH alone, and the reinforcement + 0.3 mg/kg MPH conditions of the reinforcement-manipulation SST to TD controls in Study 2 during the no-reinforcement condition of the reinforcement-manipulation SST. This analysis indicated that percent inhibition among children with ADHD with each treatment alone did not differ from that of controls in Study 2 during the no-reinforcement condition of the same task, reinforcement alone: *F*(1,51)=0.2, *p*=.67, and 0.3 mg/kg MPH alone: *F*(1,51)=0.1, *p*=.77. In addition, percent inhibition for children with ADHD during the combined treatment (reinforcement+0.3 mg/kg MPH) condition of Study 3 did not differ from that of Study 2 controls during the no-reinforcement condition of the same task, *F*(1,51)=0.6, *p*=.46. Similarly, for MRT, we found that children with ADHD with each treatment alone did not differ from that of controls in Study 2 during the no-reinforcement condition of the same task, reinforcement alone: *F*(1,51)=1.4, *p*=.25, and 0.3 mg/kg MPH alone: *F*(1,51)=0.02, *p*=.99. However, MRT for children with ADHD during the combined treatment (reinforcement+0.3 mg/kg MPH) condition of Study 3 was significantly faster than that of Study 2 controls during the no-reinforcement condition of the same task, *F*(1,51)=6.3, *p*=.02.

S3. Contribution of reaction time skew to SSRT findings

It has been suggested that slower SSRTs in children with ADHD are influenced by slower and more variable RT ([Alderson, Rapport, & Kofler, 2007](#_ENREF_1); [Alderson, Rapport, Sarver, & Kofler, 2008](#_ENREF_2); [Lijffijt, Kenemans, Verbaten, & van Engeland, 2005](#_ENREF_4)) and that estimates of SSRT are influenced by response slowing over the course of the task and RT skew ([Verbruggen, Chambers, & Logan, 2013](#_ENREF_7)). To determine whether RT skew contributed to our findings, we calculated the ex-Gaussian indicator of the exponential component (tau) of the RT distribution for the standard SST completed on the baseline day Studies 1 and 2 and the medications days in Study 1. Although children with ADHD demonstrated increased tau on the SST relative to controls, *F*(1,138)=19.3, *p*<.001, diagnostic group differences in SSRT remained after controlling for tau, *F*(1,137)=7.96, *p=*.005. In addition, MPH reduced tau in a dose-response fashion such that active methylphenidate reduced tau, *F*(1,81)=38.4, *p*<.001, and 0.6 mg/kg MPH resulted in a greater reduction in tau than did 0.3 mg/kg MPH, *F*(1,81)=7.4, *p=*.008. However, MPH significantly reduced SSRT after controlling for the effect of MPH on tau, *F*(1,80)=25.1, *p<*.001. These additional analyses suggest that RT skew does not account for the diagnostic group differences or the effects of MPH on SSRT reported in this study.

References

Alderson, R. M., Rapport, M. D., & Kofler, M. J. (2007). Attention-deficit/hyperactivity disorder and behavioral inhibition: a meta-analytic review of the stop-signal paradigm. *Journal of Abnormal Child Psychology, 35*(5), 745-758. doi: 10.1007/s10802-007-9131-6

Alderson, R. M., Rapport, M. D., Sarver, D. E., & Kofler, M. J. (2008). ADHD and behavioral inhibition: a re-examination of the stop-signal task. *Journal of Abnormal Child Psychology, 36*(7), 989-998. doi: 10.1007/s10802-008-9230-z

Ashare, R. L., Hawk, L. W., Shiels, K., Rhodes, J. D., Pelham, W. E., & Waxmonsky, J. G. (2010). Methylphenidate enhances prepulse inhibition during processing of task-relevant stimuli in attention-deficit/hyperactivity disorder. *Psychophysiology, 47*(5), 838-845. doi: 10.1111/j.1469-8986.2010.01001.x

Lijffijt, M., Kenemans, L, Verbaten, M.N., & van Engeland, H. (2005). A meta-analytic review of stopping performance in Attention-Deficit/Hyperactivity Disorder: deficient inhibitory motor control? *Journal of Abnormal Psychology, 114*(2), 216-222.

Shiels, K., Hawk, L. W., Reynolds, B., Mazzullo, R. J., Rhodes, J. D., Pelham, W. E., . . . Gangloff, B. P. (2009). Effects of methylphenidate on discounting of delayed rewards in attention deficit/hyperactivity disorder. *Experimental and Clinical Psychopharmacology, 17*(5), 291-301. doi: 10.1037/a0017259

Spencer, S. V., Hawk, L. W., Richards, J. B., Shiels, K., Pelham, W. E., & Waxmonsky, J. G. (2009). Stimulant treatment reduces lapses in attention among children with ADHD: the effects of methylphenidate on intra-individual response time distributions. *Journal of Abnormal Child Psychology, 37*(6), 805-816. doi: 10.1007/s10802-009-9316-2

Verbruggen, F., Chambers, C. D., & Logan, G. D. (2013). Fictitious inhibitory differences: how skewness and slowing distort the estimation of stopping latencies. *Psychological Science, 24*(3), 352-362. doi: 10.1177/0956797612457390
